# Supplementary material for: Synthesis and optoelectronics properties of diblock copolymer of P3HT containing thiol-side chains and its hybrid nanocomposite
Source: Royal Society of Chemistry journal article supplement (doi:10.1039/c6ra19895c), 2016-01-01
Supplement: c6ra19895c1.pdf [file c6ra19895c1.pdf]

# Supplementary Material (ESI) for RSC Advances

# This journal is © The Royal Society of Chemistry 2016

## Supporting Information

# Synthesis and optoelectronics properties of diblock copolymer of P3HT containing thiol-side chain and its hybrid nanocomposite

Yisha Qiao, Yixuan Du, Yinfeng Liu, Yunbo Li\*

School of Materials Science & Engineering, Shanghai University, Shanghai 200444, China. Email: [liyunb@shu.edu.cn](mailto:liyunb@shu.edu.cn)

## Experimental section

### 1. Synthesis of 3-[6-(4-methoxyphenoxy)hexyl]thiophene.

Figure S1 shows the spectrum of  $^1\text{H}$  NMR (500 MHz,  $\text{CDCl}_3$ ): 7.26 (s, 1H), 6.99 (t, 2H), 6.81 (s, 1H), 2.81 (m, 2H), 2.59(m, 3H), 1.74(m, 2H), 1.53-1.33 (m, 4H).

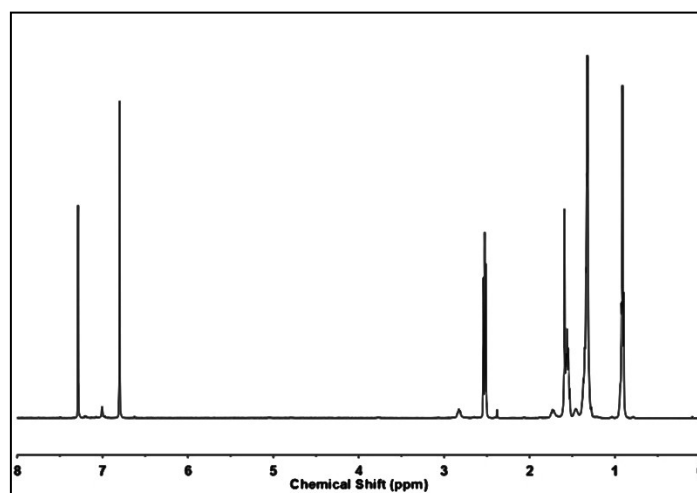

Figure S1.  $^1\text{H}$  NMR spectrum of 3-[6-(4-methoxyphenoxy)hexyl]thiophene.

## 2. Synthesis of 2, 5-dibromo-3-(6-bromohexylthiophene).

Figure S2 shows the spectrum of  $^1\text{H}$  NMR (500 MHz,  $\text{CDCl}_3$ ): 7.26 (s, 1H), 6.99 (t, 2H), 3.77 (s, 1H), 3.67 (t, 2H), 2.31 (t, 2H), 1.87 (m, 2H), 1.25-1.53 (m, 6H).

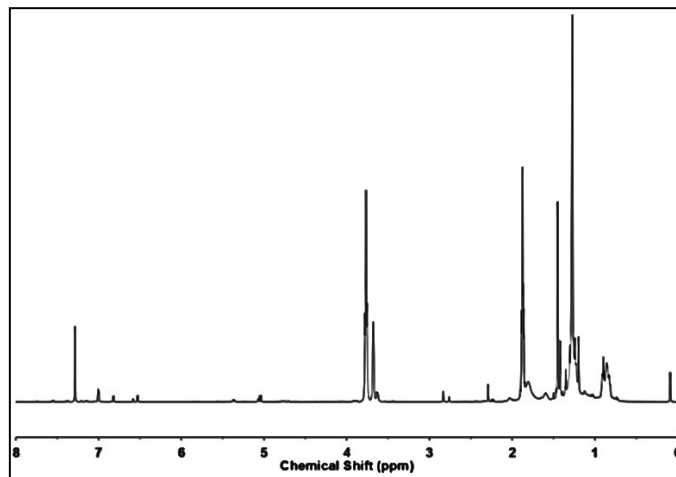

Figure S2.  $^1\text{H}$  NMR spectrum of 2, 5-dibromo-3-(6-bromohexylthiophene)

## 3. Synthesis of diblock copolymer poly(3-hexylthiophene)-b-poly(3-(6-bromohexyl-thiophene))

Figure S3 shows the spectrum of  $^1\text{H}$  NMR (500 MHz,  $\text{CDCl}_3$ ): 6.98 (s, 1H), 3.71(t, 2H), 2.82(t, 2H), 1.73(m, 2H), 1.50(m, 4H).

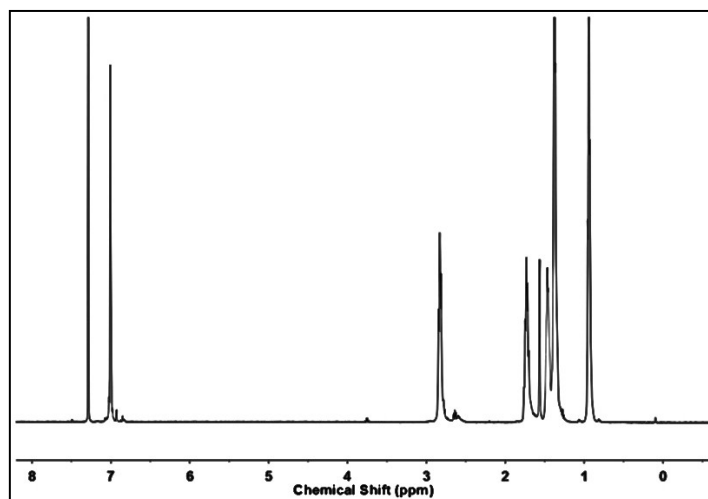

Figure S3.  $^1\text{H}$  NMR spectra of (diblock copolymer poly(3-hexylthiophene)-b-poly(3-(6-bromohexylthiophene)) (P3HT-b-P3BPT))

#### 4. Synthesis of diblock copolymer poly(3-hexylthiophene)-b-poly(3-(6-thiolhexyl thiophene)) (DP-P3HT-SH)

Figure S4 shows the spectrum of  $^1\text{H}$  NMR spectra of magnified region of DP-P3HT-SH peak at 2.61 ppm.

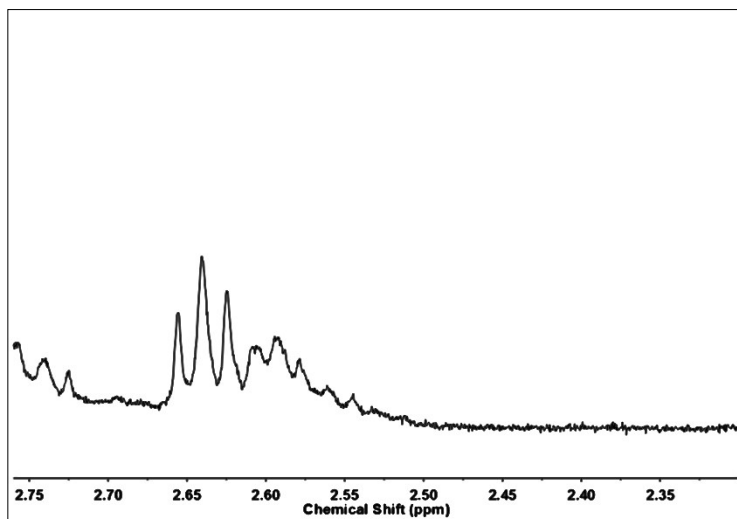

Figure S4.  $^1\text{H}$  NMR spectra of magnified region of DP-P3HT-SH peak at 2.61 ppm.
